# Supplementary material for: The incidence of diabetes among 0–34 year olds in Sweden: new data and better methods
Source: Springer Nature journal article supplement (doi:10.1007/s00125-014-3225-9), 2014-04-07
Supplement: MOESM1 [file 8092228]

# ELECTRONIC SUPPLEMENTARY MATERIAL

## INCREASING INCIDENCE OF TYPE 1 DIABETES AMONG 0-34 YEAR OLDS IN SWEDEN

**ARAZ RAWSHANI ET AL**

On behalf of the Swedish National Diabetes Register (NDR)

### CONTENTS

**TABLE I:** Incidence rates by age group (males)

**FIGURE I:** Incidence rates by age group (males)

**TABLE II:** Incidence rates by age group (females)

**FIGURE II:** Incidence rates by age group (females)

TABLE I: Incidence rates by age group and register (males)

|                   | Age group | Year                  |                        |                        |                        |                        |                        |
|-------------------|-----------|-----------------------|------------------------|------------------------|------------------------|------------------------|------------------------|
|                   |           | 2006                  | 2007                   | 2008                   | 2009                   | 2010                   | 2011                   |
| NDR               | 20–24     | 76; 27.8 (21.5, 34.0) | 70; 24.9 (19.0, 30.7)  | 64; 22.0 (16.6, 27.4)  | 74; 24.4 (18.8, 30.0)  | 61; 19.3 (14.4, 24.1)  | 66; 20.1 (15.3, 25.0)  |
|                   | 25–29     | 59; 21.2 (15.8, 26.6) | 74; 26.3 (20.3, 32.3)  | 61; 21.3 (16.0, 26.7)  | 56; 19.3 (14.2, 24.3)  | 52; 17.6 (12.8, 22.3)  | 56; 18.5 (13.7, 23.4)  |
|                   | 30–34     | 49; 15.9 (11.4, 20.3) | 62; 20.4 (15.3, 25.4)  | 48; 16.0 (11.5, 20.5)  | 50; 16.8 (12.2, 21.5)  | 47; 15.8 (11.3, 20.4)  | 39; 13.1 (9.0, 17.2)   |
| DISS              | 15–19     | 61; 19.5 (14.6, 24.4) | 63; 19.5 (14.7, 24.3)  | 56; 17.0 (12.6, 21.5)  | 50; 15.2 (11.0, 19.4)  | N/A                    | N/A                    |
|                   | 20–24     | 39; 14.3 (9.8, 18.7)  | 46; 16.3 (11.6, 21.1)  | 32; 11.0 (7.2, 14.8)   | 34; 11.2 (7.4, 15.0)   | N/A                    | N/A                    |
|                   | 25–29     | 36; 12.9 (8.7, 17.2)  | 48; 17.1 (12.2, 21.9)  | 29; 10.1 (6.5, 13.8)   | 30; 10.3 (6.6, 14.0)   | N/A                    | N/A                    |
|                   | 30–34     | 32; 10.4 (6.8, 14.0)  | 26; 8.5 (5.3, 11.8)    | 11; 3.7 (1.5, 5.8)     | 26; 8.7 (5.4, 12.1)    | N/A                    | N/A                    |
| PDR               | 0–4       | N/A                   | 59; 22.2 (16.5, 27.8)  | 58; 21.3 (15.8, 26.7)  | 81; 29.0 (22.7, 35.4)  | 64; 22.4 (16.9, 27.9)  | 81; 27.9 (21.8, 34.0)  |
|                   | 5–9       | N/A                   | 111; 45.8 (37.3, 54.3) | 126; 50.9 (42.0, 59.8) | 133; 52.2 (43.4, 61.1) | 121; 46.3 (38.0, 54.5) | 128; 47.7 (39.4, 56.0) |
|                   | 10–14     | N/A                   | 168; 59.2 (50.2, 68.1) | 149; 55.0 (46.2, 63.9) | 167; 64.2 (54.5, 73.9) | 151; 59.7 (50.2, 69.3) | 141; 56.4 (47.1, 65.7) |
|                   | 15–19     | N/A                   | 148; 45.8 (38.4, 53.2) | 127; 38.6 (31.9, 45.4) | 140; 42.6 (35.5, 49.6) | 137; 42.4 (35.3, 49.5) | 132; 42.4 (35.1, 49.6) |
|                   | 20–24     | N/A                   | 80; 28.4 (22.2, 34.7)  | 70; 24.0 (18.4, 29.7)  | 96; 31.7 (25.3, 38.0)  | 80; 25.3 (19.8, 30.8)  | 92; 28.1 (22.3, 33.8)  |
|                   | 25–29     | N/A                   | 96; 34.1 (27.3, 40.9)  | 76; 26.6 (20.6, 32.6)  | 71; 24.4 (18.7, 30.1)  | 68; 23.0 (17.5, 28.4)  | 77; 25.4 (19.8, 31.1)  |
|                   | 30–34     | N/A                   | 81; 26.6 (20.8, 32.4)  | 70; 23.3 (17.8, 28.7)  | 83; 27.9 (21.9, 33.9)  | 61; 20.6 (15.4, 25.7)  | 78; 26.2 (20.4, 32.0)  |
| CARE <sup>a</sup> | 20–24     | N/A                   | 97; 34.5 (27.7, 41.4)  | 92; 31.7 (25.2, 38.1)  | 106; 35.0 (28.4, 41.7) | N/A                    | N/A                    |
|                   | 25–29     | N/A                   | 139; 49.4 (41.2, 57.6) | 107; 37.2 (30.2, 44.3) | 97; 33.4 (26.7, 40.0)  | N/A                    | N/A                    |
|                   | 30–34     | N/A                   | 144; 47.4 (39.7, 55.1) | 94; 31.3 (24.9, 37.6)  | 106; 35.5 (28.8, 42.3) | N/A                    | N/A                    |

Absolute number of cases; incidence rates per 100'000 person-years (95% confidence intervals).  
<sup>a</sup>CARE = Capture-recapture estimate using the PDR, the DISS and the NDR.  
N/A, not applicable.

FIGURE I: Incidence rates by age group and register (males)

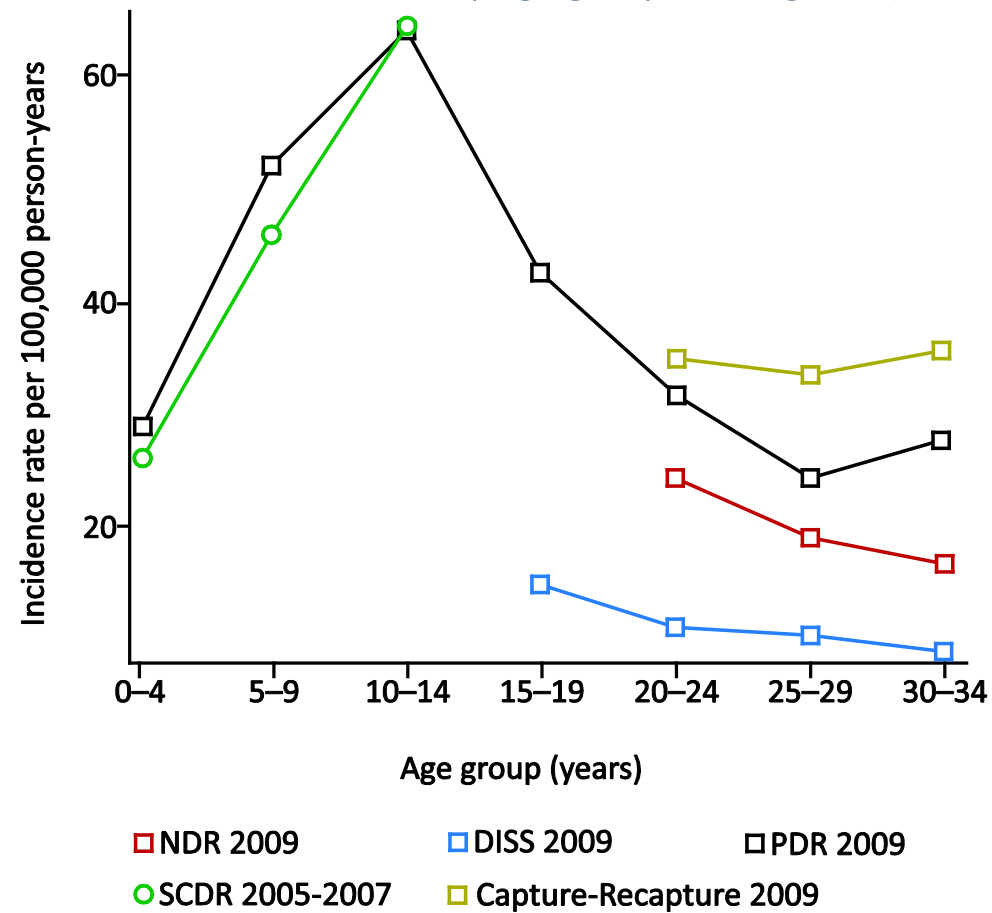

Incidence rates (males) per 100'000 person-years. Capture-Recapture (2007-2009) included the DISS, the NDR and the PDR. Figures from the SCDR (Swedish Childhood Diabetes Register) was obtained from Berhan et al (Diabetes, 2011 Feb;60(2):577-81).

TABLE II: Incidence rates by age group and register (females)

|                   | Age group | Year                  |                        |                        |                        |                        |                        |
|-------------------|-----------|-----------------------|------------------------|------------------------|------------------------|------------------------|------------------------|
|                   |           | 2006                  | 2007                   | 2008                   | 2009                   | 2010                   | 2011                   |
| NDR               | 20–24     | 50; 19.2 (13.9, 24.5) | 42; 15.7 (10.9, 20.4)  | 48; 17.3 (12.4, 22.2)  | 60; 20.7 (15.5, 25.9)  | 48; 15.9 (11.4, 20.4)  | 34; 10.8 (7.2, 14.5)   |
|                   | 25–29     | 47; 17.6 (12.5, 22.6) | 26; 9.6 (5.9, 13.3)    | 48; 17.6 (12.6, 22.6)  | 45; 16.3 (11.5, 21.0)  | 42; 15.0 (10.4, 19.5)  | 35; 12.2 (8.2, 16.3)   |
|                   | 30–34     | 34; 11.4 (7.6, 15.3)  | 41; 14.0 (9.7, 18.3)   | 27; 9.4 (5.8, 12.9)    | 27; 9.5 (5.9, 13.0)    | 16; 5.6 (2.9, 8.4)     | 12; 4.2 (1.8, 6.6)     |
| DISS              | 15–19     | 35; 11.8 (7.9, 15.7)  | 37; 12.1 (8.2, 16.0)   | 25; 8.1 (4.9, 11.2)    | 21; 6.8 (3.9, 9.6)     | N/A                    | N/A                    |
|                   | 20–24     | 30; 11.5 (7.4, 15.6)  | 21; 7.8 (4.5, 11.2)    | 19; 6.8 (3.8, 9.9)     | 26; 9.0 (5.5, 12.4)    | N/A                    | N/A                    |
|                   | 25–29     | 17; 6.3 (3.3, 9.4)    | 10; 3.7 (1.4, 6.0)     | 20; 7.3 (4.1, 10.5)    | 25; 9.0 (5.5, 12.6)    | N/A                    | N/A                    |
|                   | 30–34     | 19; 6.4 (3.5, 9.3)    | 13; 4.4 (2.0, 6.8)     | 9; 3.1 (1.1, 5.2)      | 9; 3.2 (1.1, 5.2)      | N/A                    | N/A                    |
| PDR               | 0–4       | N/A                   | 57; 22.6 (16.7, 28.4)  | 48; 18.6 (13.3, 23.8)  | 65; 24.6 (18.7, 30.6)  | 68; 25.2 (19.2, 31.2)  | 69; 25.2 (19.2, 31.1)  |
|                   | 5–9       | N/A                   | 119; 51.8 (42.5, 61.1) | 113; 48.1 (39.2, 57.0) | 107; 44.3 (35.9, 52.7) | 112; 45.1 (36.8, 53.5) | 118; 46.3 (37.9, 54.6) |
|                   | 10–14     | N/A                   | 125; 46.2 (38.1, 54.3) | 116; 45.0 (36.8, 53.2) | 123; 49.8 (41.0, 58.6) | 126; 52.6 (43.4, 61.8) | 125; 52.8 (43.6, 62.1) |
|                   | 15–19     | N/A                   | 82; 26.8 (21.0, 32.7)  | 76; 24.5 (19.0, 30.0)  | 66; 21.2 (16.1, 26.3)  | 82; 26.8 (21.0, 32.7)  | 72; 24.5 (18.8, 30.1)  |
|                   | 20–24     | N/A                   | 52; 19.4 (14.1, 24.7)  | 56; 20.2 (14.9, 25.4)  | 61; 21.1 (15.8, 26.3)  | 59; 19.5 (14.5, 24.5)  | 44; 14.0 (9.9, 18.2)   |
|                   | 25–29     | N/A                   | 46; 17.1 (12.1, 22.0)  | 49; 18.0 (12.9, 23.0)  | 53; 19.2 (14.0, 24.3)  | 48; 17.1 (12.3, 21.9)  | 58; 20.3 (15.1, 25.5)  |
|                   | 30–34     | N/A                   | 75; 25.6 (19.8, 31.4)  | 60; 20.8 (15.5, 26.0)  | 42; 14.7 (10.3, 19.2)  | 37; 13.0 (8.8, 17.2)   | 35; 12.3 (8.2, 16.3)   |
| CARE <sup>a</sup> | 20–24     | N/A                   | 83; 31.1 (24.4, 37.7)  | 83; 29.7 (23.3, 36.1)  | 80; 27.4 (21.4, 33.5)  | N/A                    | N/A                    |
|                   | 25–29     | N/A                   | 73; 27.1 (20.9, 33.3)  | 82; 30.1 (23.6, 36.6)  | 75; 27.3 (21.1, 33.4)  | N/A                    | N/A                    |
|                   | 30–34     | N/A                   | 111; 37.9 (30.8, 44.9) | 92; 31.8 (25.3, 38.4)  | 75; 26.2 (20.3, 32.2)  | N/A                    | N/A                    |

Absolute number of cases; incidence rates per 100'000 person-years (95% confidence intervals).  
<sup>a</sup>CARE = Capture-recapture estimate using the PDR, the DISS and the NDR.  
N/A, not applicable.

FIGURE II: Incidence rates by age group and register (females)

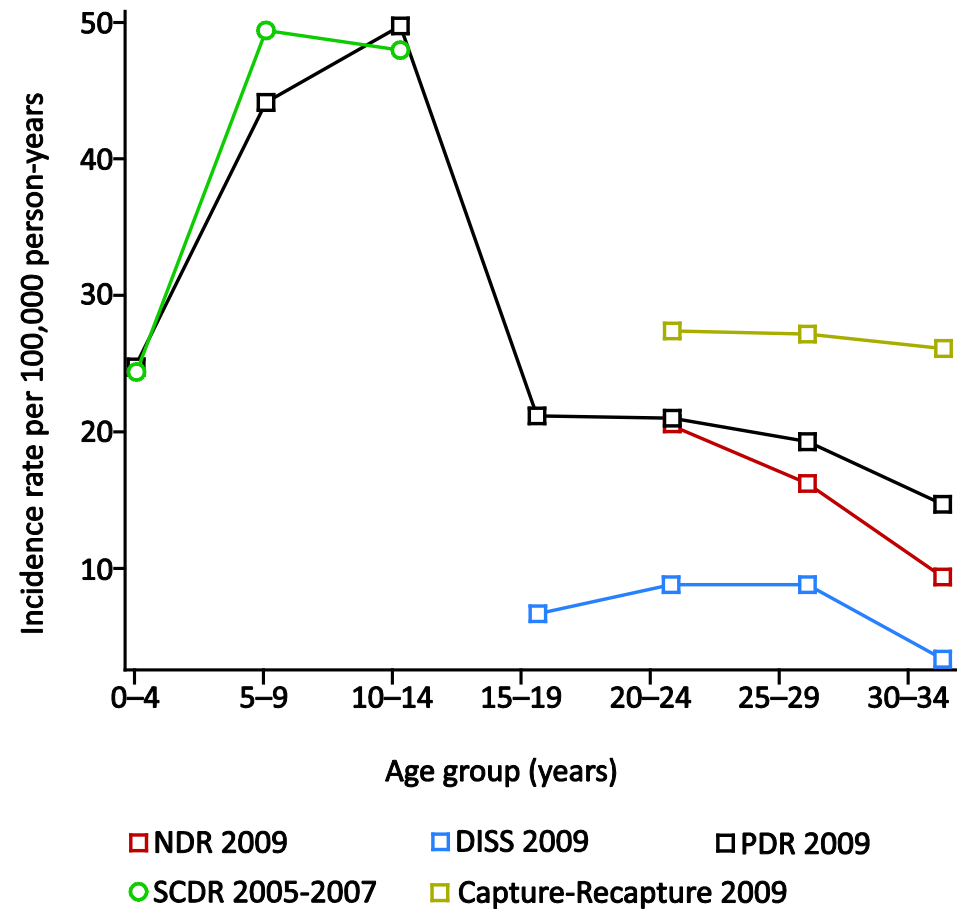

Incidence rates (females) per 100'000 person-years. Capture-Recapture (2007-2009) included the DISS, the NDR and the PDR. Figures from the SCDR (Swedish Childhood Diabetes Register) was obtained from Berhan et al (Diabetes, 2011 Feb;60(2):577-81).
